# Supplementary material
Source: PubMed Central journal article supplement (PMC2972953)
Supplement: 1005582107_pnas.201005582SI.pdf [file 1005582107_pnas.201005582SI.pdf]

# Supporting Information

Nabekura et al. 10.1073/pnas.1005582107

## SI Materials and Methods

**Mice.** C57BL/6N (B6) (H-2<sup>b</sup>) and B6C3F1 mice (B6 × C3H/NeN F<sub>1</sub> mice: H-2<sup>b/k</sup>) were purchased from Nihon Clea. C3.SW-H2<sup>b</sup>-Sn/J (C3) (H-2<sup>b</sup>) mice were purchased from the Jackson Laboratory. DNAX accessory molecule-1 (DNAM-1)-heterozygous mice that were generated from BALB/c embryonic stem cells were backcrossed with B6 mice for 10 generations (1), and DNAM-1 WT and DNAM-1-deficient (KO) littermates were obtained by intercrossing with heterozygous B6 mice. All mice were housed and bred under specific-pathogen-free conditions at the Animal Resource Center of the University of Tsukuba. All experiments using mice were approved by the Institutional Review Committee and performed according to the guidelines of the University of Tsukuba.

**Graft-Versus-Host-Disease Model.** Recipient B6C3F1 mice were sublethally irradiated with 500 cGy by X-ray (Hitachi Medical Corporation). Fifty-million splenocytes from DNAM-1 WT or KO B6 mice were i.v. infused into each recipient B6C3F1 mouse. For prophylaxis, 100 µg TX42 was injected i.p. into the recipient mice 1 d before transplantation (day -1) and then every other day for nine additional doses (total 10 times, 1.0 mg per mouse). For therapy, 300 µg TX42 was injected i.p. beginning on day 14 and then every week for nine additional doses (total 10 times, 3.0 mg per mouse), or 1.0 mg TX42 was injected i.p. once into the recipient mice on day 14.

In some experiments, B6C3F1 recipient mice were transplanted with  $3.8 \times 10^7$  T cell-depleted splenocytes (TCD-SP) alone or the same number of TCD-SP plus  $7.0 \times 10^6$  CD4<sup>+</sup> T cells (derived from DNAM-1 WT or KO mice) and  $5.0 \times 10^6$  CD8<sup>+</sup> T cells (derived from DNAM-1 WT or KO mice) after sublethal irradiation with 500 cGy by X-ray. TCD-SP were purified from WT B6 mice by negative selection with biotinylated anti-CD4 and CD8 mAbs, followed with Dynabeads MyONE streptavidin (Invitrogen). TCD-SP contained T cells at less than 3%, as determined by flow cytometry. CD4<sup>+</sup> and CD8<sup>+</sup> T cells were purified from the spleens of DNAM-1 WT or KO B6 mice by negative selection with biotinylated anti-B220, CD11b, CD11c, Gr-1, and DX5 (CD49b) mAbs and either biotinylated CD8 or CD4 mAbs, followed with Dynabeads MyONE streptavidin. Purities of CD4<sup>+</sup> and CD8<sup>+</sup> T cells were more than 85%, as determined by flow cytometry.

To examine whether DNAM-1 on recipient cells is involved in development of graft-versus-host disease (GVHD), we generated DNAM-1 WT or KO CBF1 mice (H-2<sup>b/d</sup>) by crossing *Cd226*<sup>+/-</sup> BALB/c mice with *Cd226*<sup>+/-</sup> B6 mice. These mice received  $1 \times 10^7$  splenocytes from WT B6 mice after sublethally irradiation (600 cGy).

For a GVHD model after MHC-matched, minor antigen-mismatched bone marrow transplantation (BMT), recipient C3 mice were lethally irradiated with 900 cGy one day before BMT (day -1), and then  $5 \times 10^6$  bone marrow cells and  $4 \times 10^6$  spleen T cells from B6 mice were i.v. infused into each recipient mouse on day 0.

**Antibodies.** The anti-DNAM-1 mAb TX42 (rat IgG2a) and anti-CD155 mAb TX56 (rat IgG2a), neutralizing mAb that is able to block interaction between DNAM-1 and its ligands CD112 or CD155, were generated in our laboratory (1, 2). Intraperitoneal injection with the TX42 mAb did not deplete T cells or NK cells in mice (Fig. S2A and ref. 2), and TX42 mAb was detected on CD8<sup>+</sup> T cells for more than 10 d after in vivo administration (Fig. S2B). Polyclonal rat IgG and anti-H-2K<sup>k</sup> mAb was purchased from MP

Biomedicals and BioLegend, respectively. All other mAbs used in this study were purchased from BD Biosciences.

**ELISA.** IFN-γ in the sera was measured by ELISA using an anti-IFN-γ mAb (clone AN-18; BD Biosciences) and biotinylated anti-IFN-γ mAb (clone R4-6A2; BD Biosciences) as capture and detection mAbs, respectively, followed by streptavidin-conjugated horseradish peroxidase (GE Healthcare Biosciences). For evaluation of IFN-γ production from CD8<sup>+</sup> T cells in vitro,  $10^5$  splenic CD8<sup>+</sup> T cells from naive DNAM-1 WT or KO B6 mice (resting CD8<sup>+</sup> T cells) or recipient mice that received DNAM-1 WT splenocytes (effector CD8<sup>+</sup> T cells) were stimulated with plate-bound polyclonal rat IgG or TX42 in addition to plate-bound anti-CD3 mAb for 12 h. For in vitro coculture stimulation,  $5 \times 10^4$  DNAM-1 WT or KO CD8<sup>+</sup> T cells were cocultured with  $5 \times 10^5$  splenocytes from syngeneic B6 or allogeneic B6C3F1 mice for 3 d.

**Assessment of GVHD.** Aminotransferase (ALT) and aspartate aminotransferase (AST) values in the sera were measured by using a Fuji Dri-Chem 3500V slide analyzer (Fujifilm). Histopathological diagnosis of the liver and small intestine was performed as described (3, 4). The peripheral blood cells were counted by an automated blood cell counter (Celltaca MEK-6358; Nihon Kohden).

**Infiltrating Donor Lymphocytes.** The liver and small intestine were isolated from the recipient mice on day 14 after transplantation. Liver was mechanically ground in RPMI-1640 medium with 5% FBS. A cell suspension from the lumen of the small intestine was prepared by using a scraper (BD Biosciences). These cell suspensions were passed through a nylon mesh to remove debris, added with mouse BD Fc Block, and stained with fluorochrome-conjugated anti-CD3, CD4, CD8, CD45.2, NK1.1, or H-2K<sup>k</sup> mAbs. Donor-derived lymphocytes were gated by CD45.2<sup>+</sup> and H-2K<sup>k</sup> populations, and then each lymphocyte subset was defined as follows: CD4<sup>+</sup> T cells, CD3<sup>high</sup>CD4<sup>+</sup>; CD8<sup>+</sup> T cells, CD3<sup>high</sup>CD8<sup>+</sup>; NK cells, CD3<sup>-</sup>NK1.1<sup>+</sup>; and NKT cells, CD3<sup>low</sup>NK1.1<sup>+</sup>.

**Proliferation Assays.** For evaluation of the proliferation of effector CD8<sup>+</sup> T cells, sublethally (500 cGy) irradiated B6C3F1 mice were i.v. infused with  $5 \times 10^7$  DNAM-1 WT or KO B6 splenocytes. The donor CD8<sup>+</sup> T cells, most of which were CD44<sup>high</sup>CD62L<sup>low</sup> effector T cells (Fig. S5), were purified from the spleens of the recipient mice by use of the anti-CD8 (Ly-2) MACS beads (Miltenyi Biotec) at 14 to 35 d after splenocyte infusion and labeled with 5-(and 6)-carboxyfluorescein diacetate succinimidyl ester (CFSE) (Invitrogen). CFSE-labeled CD8<sup>+</sup> T cells ( $5 \times 10^4$ ) were stimulated with plate-bound rat IgG or TX42 in addition to plate-bound anti-CD3 mAb for 3 d. For in vitro coculture stimulation,  $5 \times 10^4$  CFSE-labeled DNAM-1 WT or KO CD8<sup>+</sup> T cells were cocultured for 3 d with  $5 \times 10^5$  splenocytes,  $3 \times 10^4$  CD11c<sup>+</sup> dendritic cells or  $4.7 \times 10^5$  CD11c-depleted splenocytes from syngeneic B6 or allogeneic B6C3F1 mice. Dendritic cells were purified from the spleen by using the anti-CD11c MACS beads (Miltenyi Biotec). CD11c-depleted splenocytes were purified by negative selection with biotinylated anti-CD11c mAbs (BD Biosciences), followed with Dynabeads MyONE streptavidin (Invitrogen). In some coculture experiments,  $5 \times 10^4$  CFSE-labeled DNAM-1 WT CD8<sup>+</sup> T cells were cocultured for 3 d with  $5 \times 10^5$  syngeneic B6 or allogeneic B6C3F1 splenocytes that had been treated with control Ig or TX56 after blocking Fc receptors with BD Fc Block. Stimulator cells were used after the treatment with 100 µg/mL mitomycin C





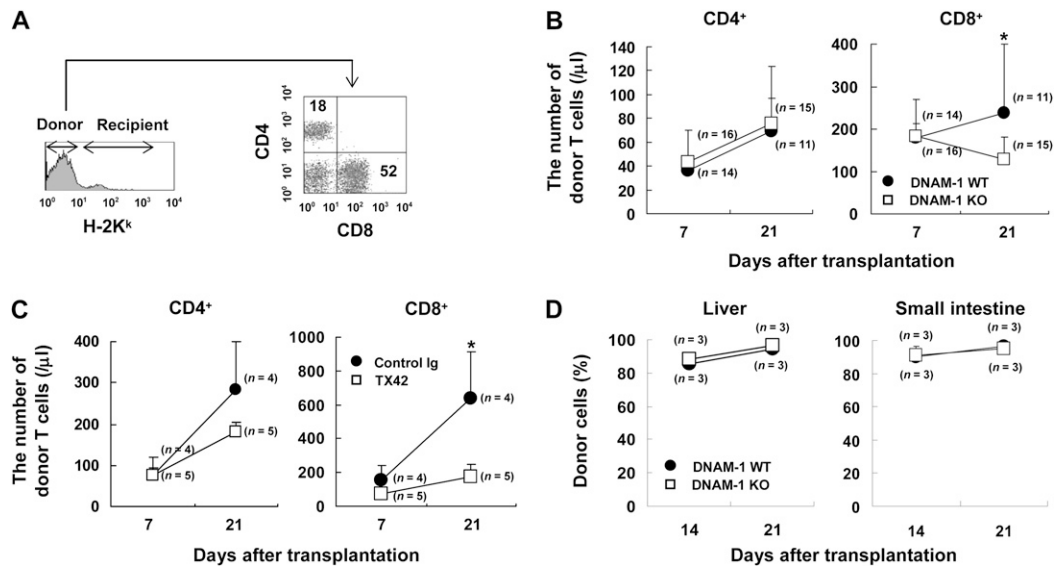

**Fig. 54.** DNAM-1 is involved in donor CD8<sup>+</sup> T-cell proliferation in recipient mice. (A–D) After sublethal irradiation, B6C3F1 mice received splenocytes from WT or KO B6 mice. (C) Some of the mice that received WT splenocytes were i.p. injected with anti-DNAM-1 (TX42) or control antibodies every other day from day –1 until day 17 after transplantation. (A) Peripheral blood cells from the recipient mice were simultaneously stained with FITC-conjugated anti-H-2K<sup>k</sup>, PE-Cy5-conjugated anti-CD4, and PE-conjugated anti-CD8 mAbs, and analyzed by flow cytometry. Representative profile of flow cytometry data on day 7 after transplantation is shown. Data are representative of more than five independent experiments. (B and C) The absolute number of donor CD4<sup>+</sup> and CD8<sup>+</sup> T cells in recipient peripheral blood was calculated as the number of white blood cells multiplied by the percentage of total donor T cells determined by flow cytometric analysis. Data in B and C are representative of two and three independent experiments, respectively. (D) On days 14 and 21 after transplantation, the infiltrating donor cells in the liver and small intestine of recipient mice were separated, stained with PerCP-conjugated anti-CD45.2 and FITC-conjugated anti-H-2K<sup>k</sup>, and analyzed by flow cytometry. Percentages of donor cells (H-2K<sup>k</sup><sup>–</sup> gated by CD45.2<sup>+</sup>) are shown. Experiments were performed twice, with similar results. One experiment is shown. \* $P < 0.05$ , DNAM-1 WT vs. KO mice (B) or control Ig vs. TX42 (C). Error bars show SD.

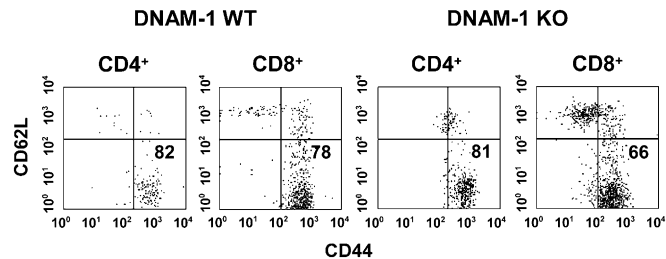

**Fig. 55.** Differentiation of donor T cells after transplantation. After sublethal irradiation, B6C3F1 mice received splenocytes from DNAM-1 WT or KO B6 mice, as shown in Fig. 1A. On day 21 after transplantation, PBMC were collected and stained with FITC-conjugated anti-H-2K<sup>k</sup>, APC-conjugated anti-CD44, PE-conjugated anti-CD62L, and either PE-Cy5-conjugated anti-CD4 or anti-CD8 mAbs and analyzed by flow cytometry. The profiles on H-2K<sup>k</sup><sup>–</sup>CD4<sup>+</sup> or H-2K<sup>k</sup><sup>–</sup>CD8<sup>+</sup> gates are shown. Experiments were performed twice independently ( $n = 4$  in each experiment), with similar results. Data are representative from four mice of one experiment.
